# Supplementary material for: Synthesis of chitosan-coated near-infrared layered double hydroxide nanoparticles for in vivo optical imaging
Source: Royal Society of Chemistry journal article supplement (doi:10.1039/c2jm16447g), 2012-01-01
Supplement: c2jm16447g.pdf [file c2jm16447g.pdf]

Supporting Information

## Synthesis of Chitosan-Coated Near-Infrared Layered Double Hydroxide Nanoparticles for In Vivo Optical Imaging

Pei-Ru Wei<sup>1</sup>, Shih-Hsun Cheng<sup>1</sup>, Wei-Neng Liao, Kun-Che Kao  
Ching-Feng Weng and Chia-Hung Lee\*

Department of Life Science and Institute of Biotechnology, National Dong Hwa  
University, Hualien, 974, Taiwan. E-mail: chlee016@mail.ndhu.edu.tw;

Fax: + 886-3-863-3630; Tel: + 886-3-863-3682

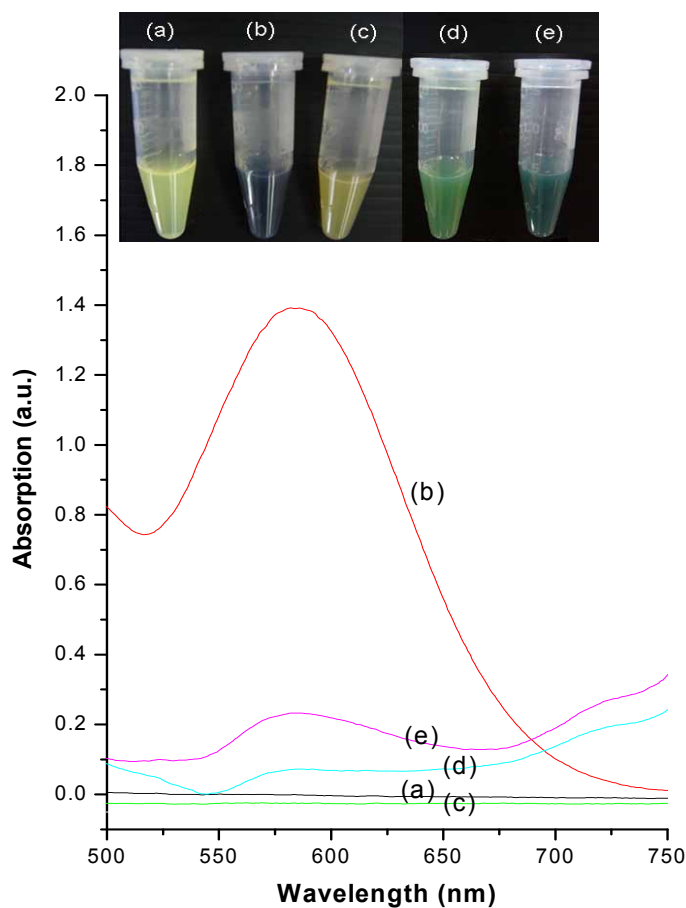

**Fig. S1** UV-Vis spectra and white-light sample images of (a) LDHs, (b) LDHs-NH<sub>2</sub>, (c) LDHs-NH<sub>2</sub>-GA, (d) LDHs-NH<sub>2</sub>-ICG-CS-1, and (e) LDHs-NH<sub>2</sub>-ICG-CS-2 samples.

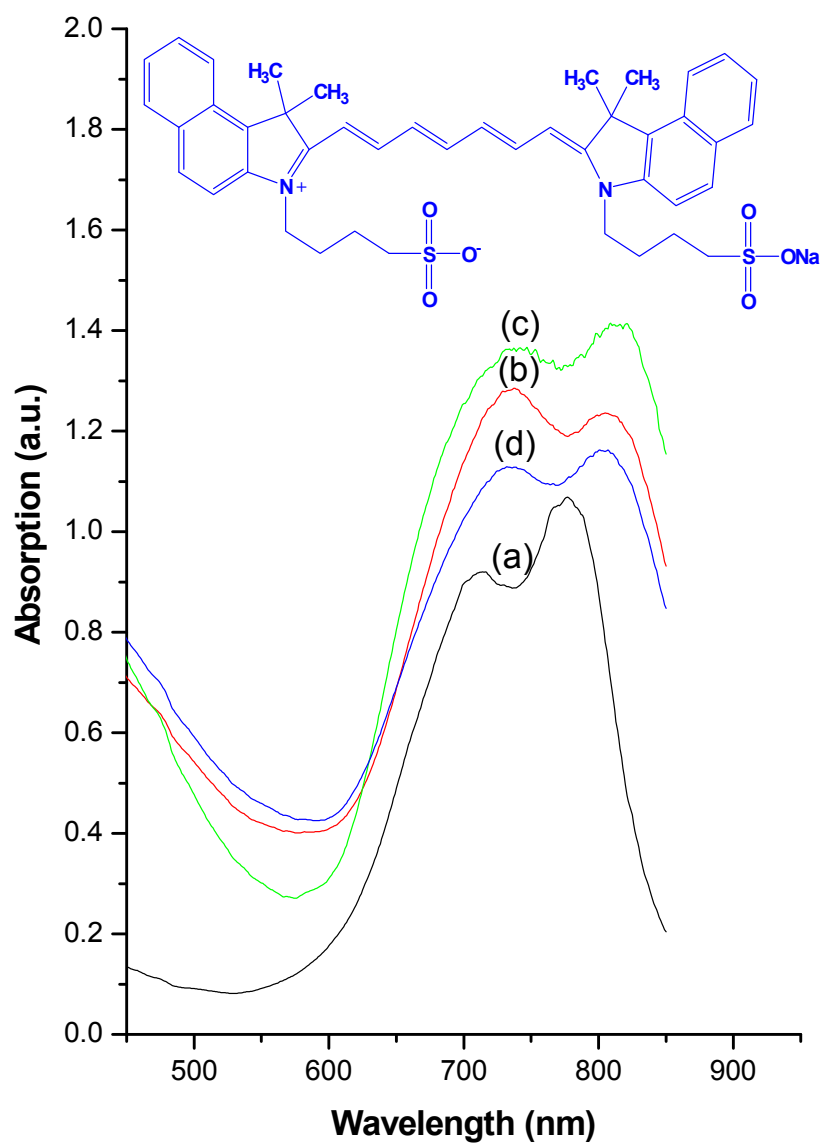

**Fig. S2** UV-vis spectra of (a) free ICG, (b) LDHs-NH<sub>2</sub>-ICG, (c) LDHs-NH<sub>2</sub>-ICG-CS-1, and (d) LDHs-NH<sub>2</sub>-ICG-CS-2 samples in dd-H<sub>2</sub>O.

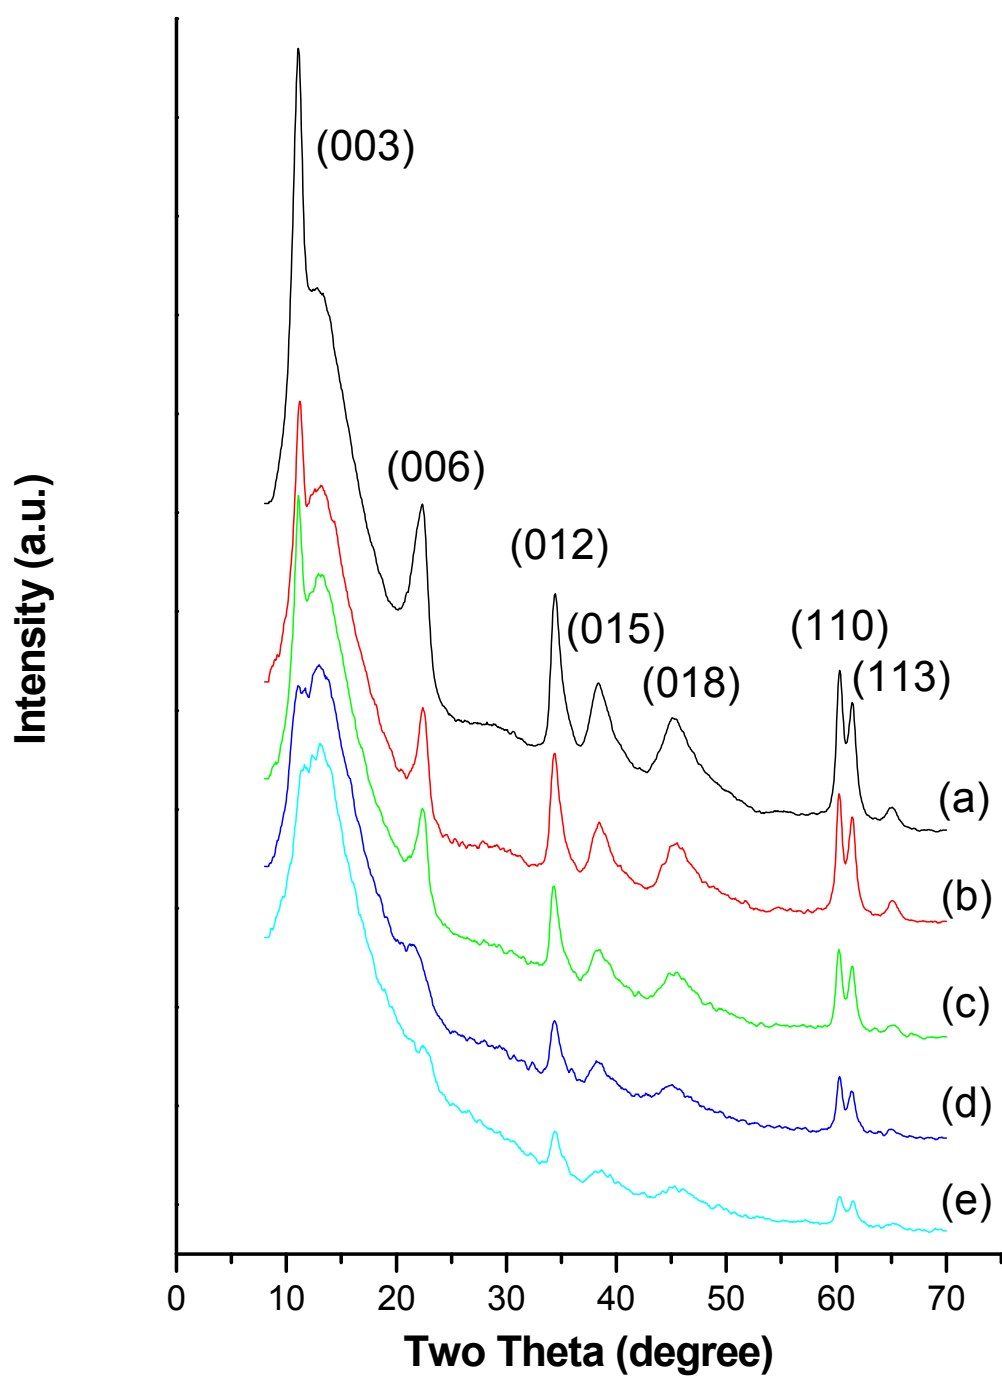

**Fig. S3** XRD patterns of (a) LDHs, (b) LDHs-NH<sub>2</sub>, (c) LDHs-NH<sub>2</sub>-ICG, (d) LDHs-NH<sub>2</sub>-ICG-CS-1, and (e) LDHs-NH<sub>2</sub>-ICG-CS-2.

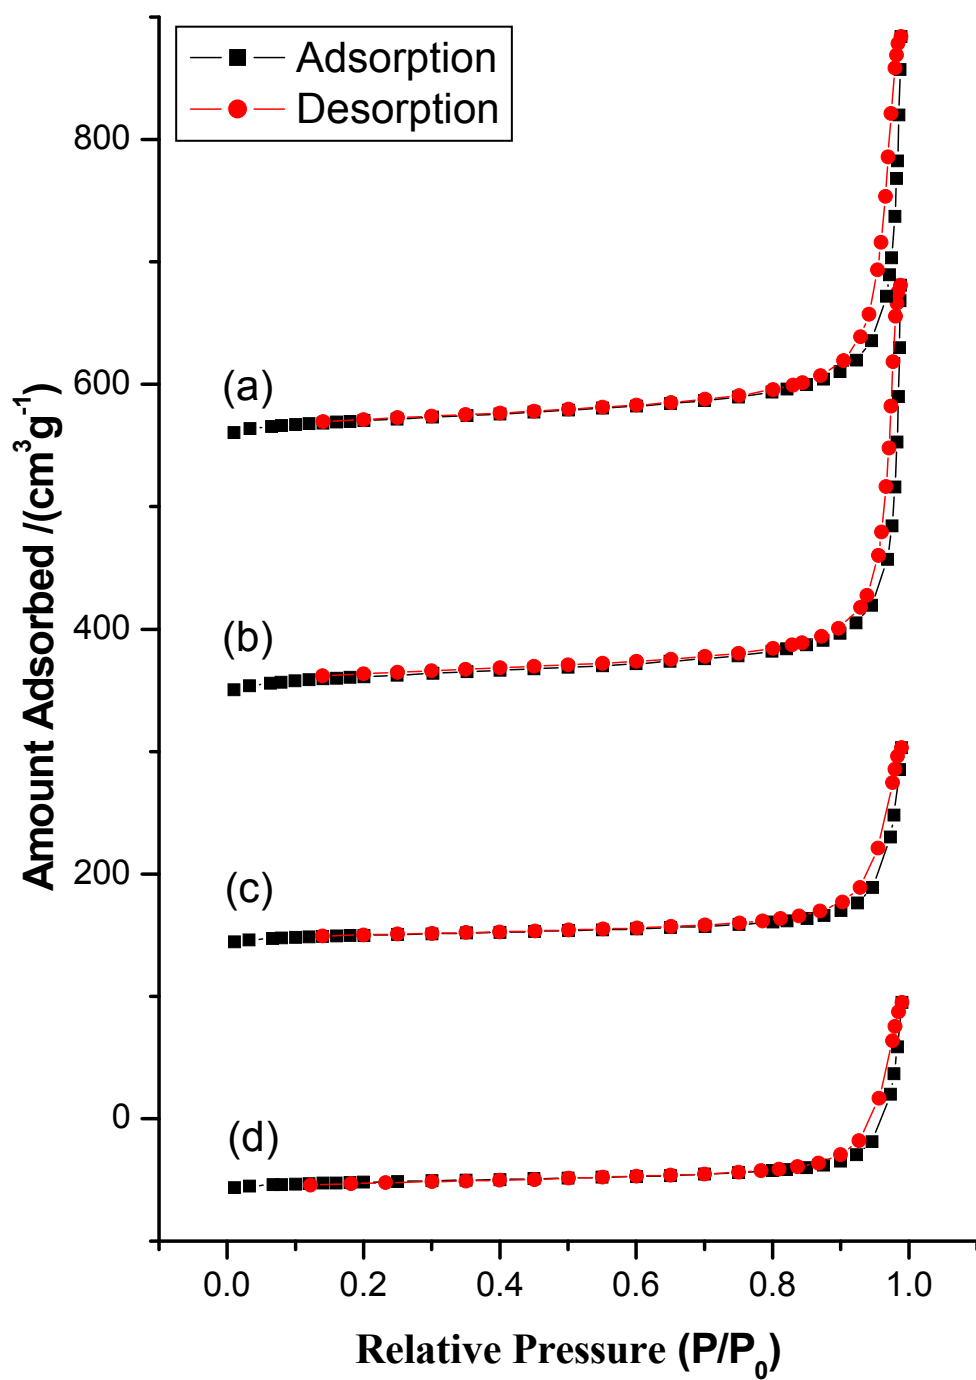

**Fig. S4** Nitrogen adsorption-desorption isotherms of (a) LDHs-NH<sub>2</sub>, (b) LDHs-NH<sub>2</sub>-ICG, (c) LDHs-NH<sub>2</sub>-ICG-CS-1, and (d) LDHs-NH<sub>2</sub>-ICG-CS-2.

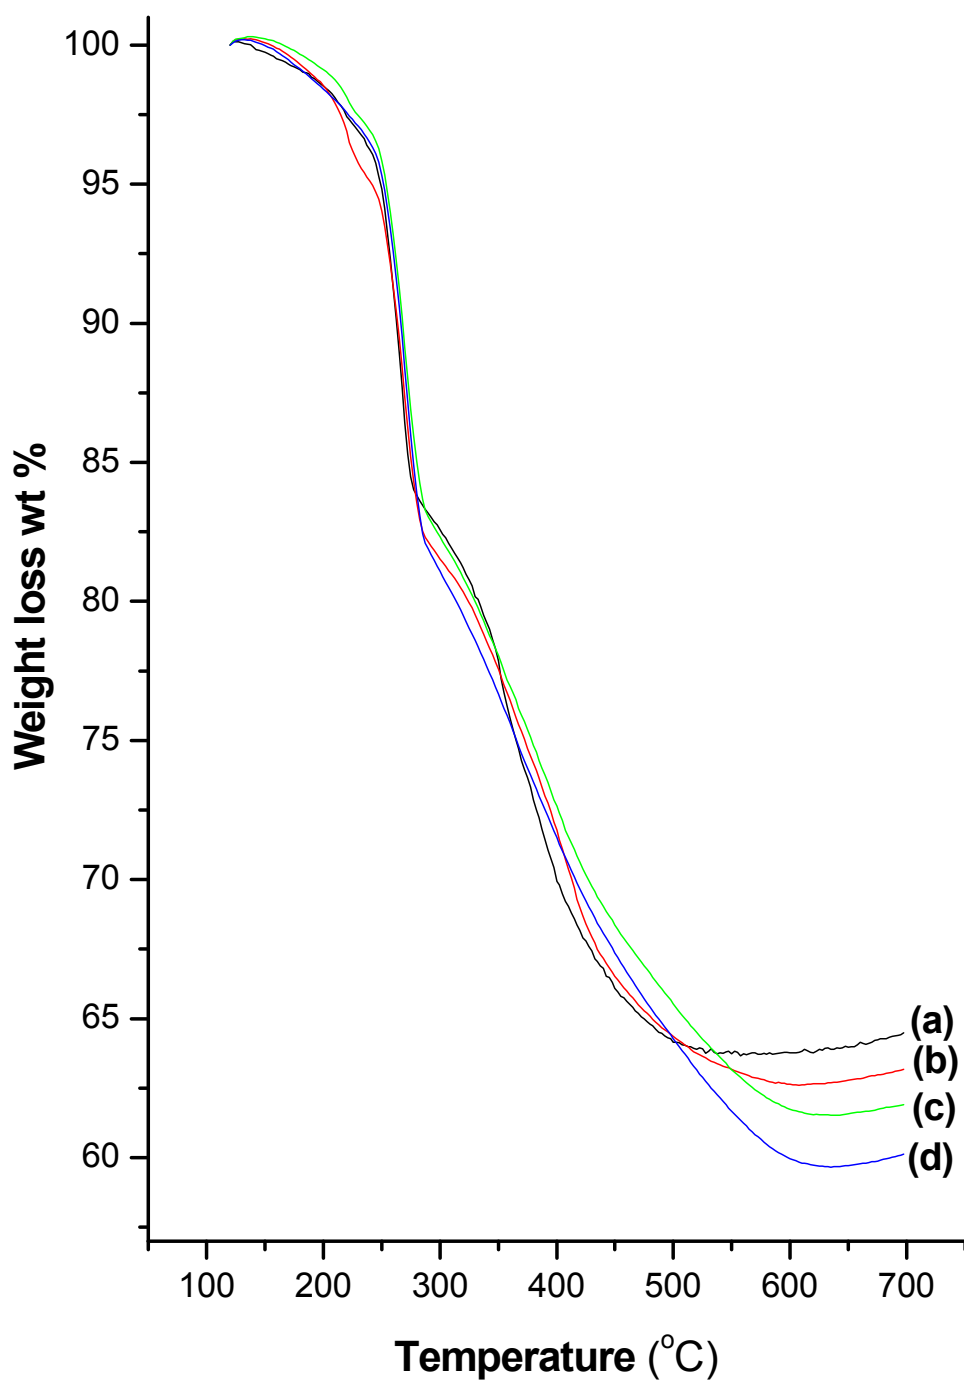

**Fig. S5** Weight loss profiles of thermogravimetric analyses (TGA) of (a) LDHs-NH<sub>2</sub>, (b) LDHs-NH<sub>2</sub>-ICG, (c) LDHs-NH<sub>2</sub>-ICG-CS-1, and (d) LDHs-NH<sub>2</sub>-ICG-CS-2 samples.

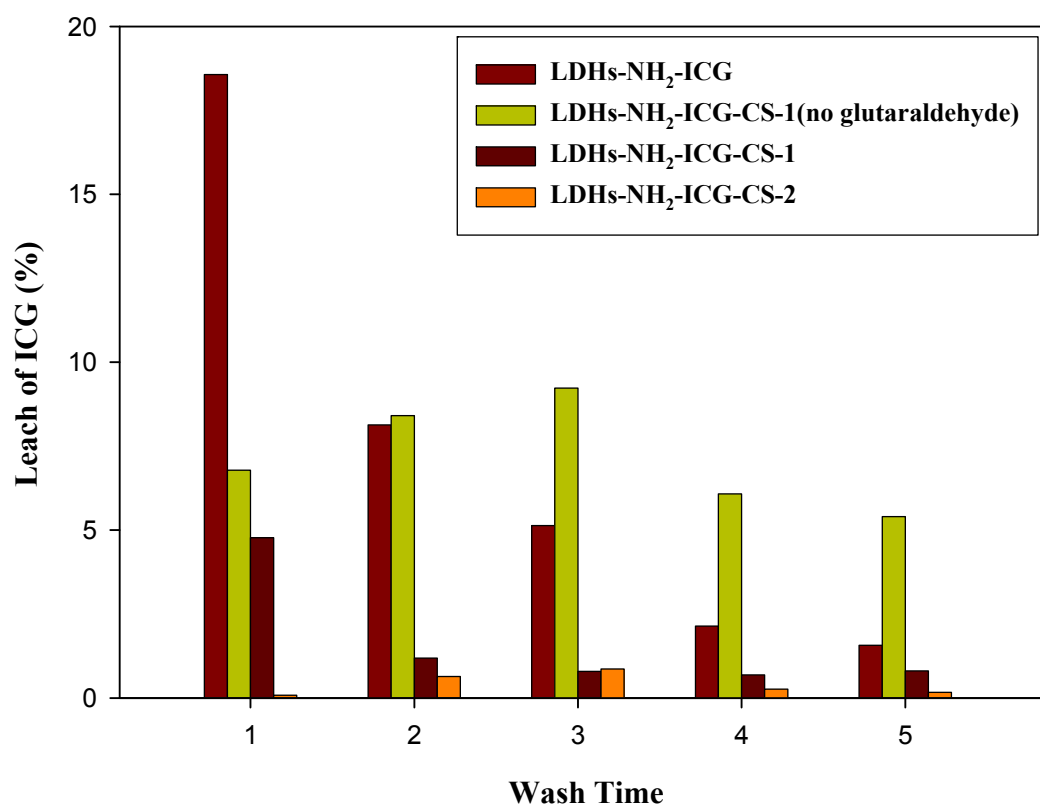

**Fig. S6** Wash time 1–5: leaching amounts of ICG after wash with methanol for 1–5 times.

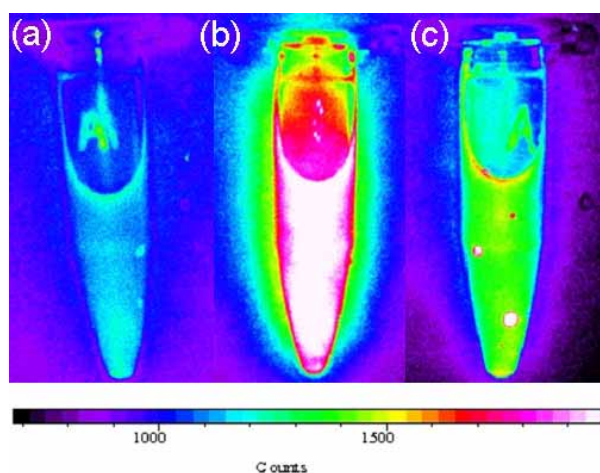

**Fig. S7** Fluorescent imaging intensity of (a) LDHs-NH<sub>2</sub>-ICG, (b) LDHs-NH<sub>2</sub>-ICG-CS-1, and (c) LDHs-NH<sub>2</sub>-ICG-CS-2 in aqueous solution (1 mg mL<sup>-1</sup>).

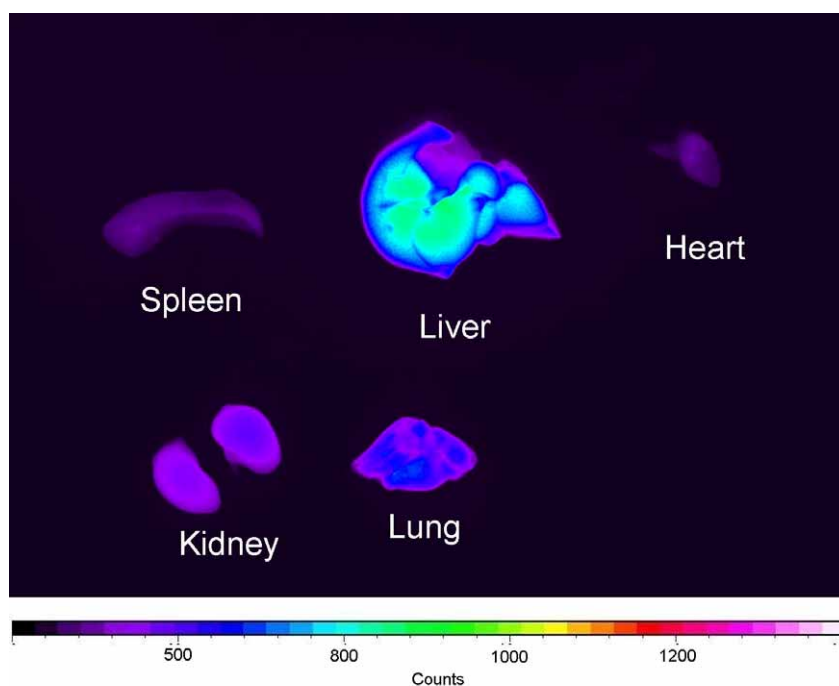

**Fig. S8** NIR fluorescent images of dissected organs from a mouse sacrificed after i.v. injection of LDHs-NH<sub>2</sub>-ICG-CS-2-TA samples for 3 h.

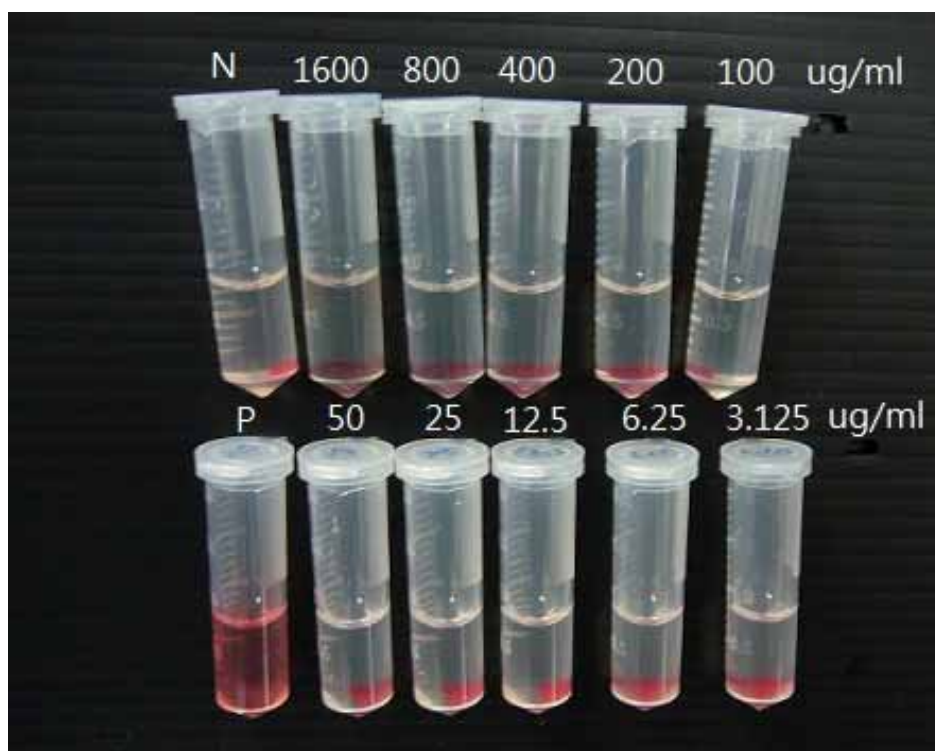

**Fig. S9** Photographs of hemolysis of RBCs after the treatment of various concentrations of LDHs-NH<sub>2</sub>-ICG-CS-2 samples for 3 h. The red hemoglobin in the supernatant indicated the damage of RBCs in the positive control experiment. dd-H<sub>2</sub>O and PBS are used as positive (P) and negative (N) controls, respectively.



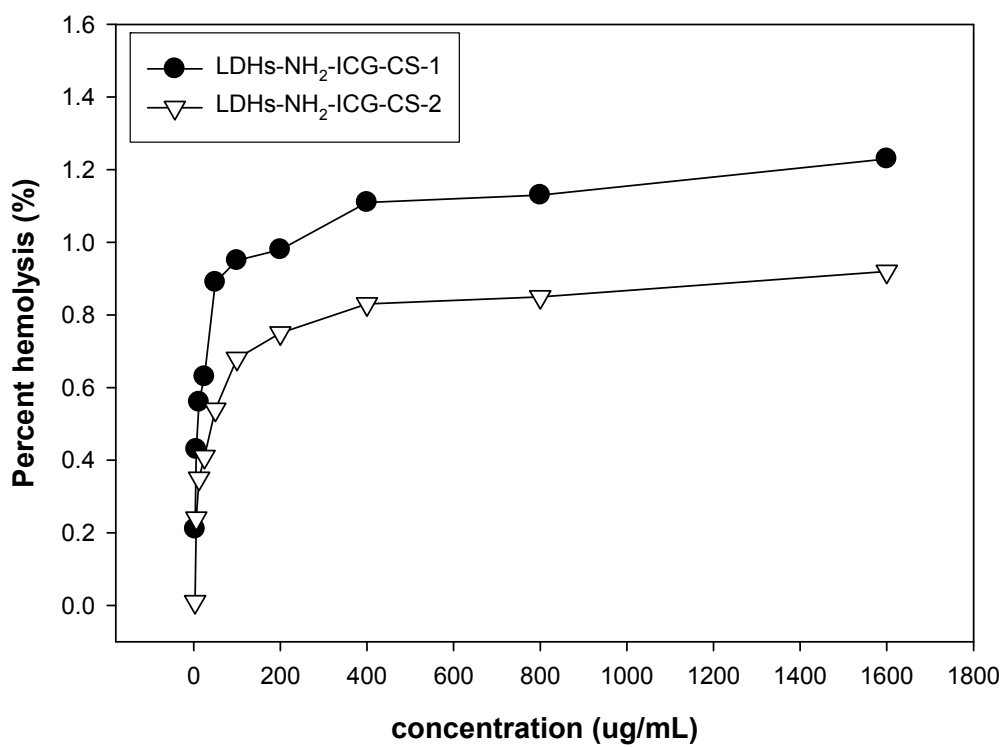

**Fig. S10** Percentage of hemolysis of RBCs after the treatment of various concentrations of LDHs-NH<sub>2</sub>-ICG-CS-1 and -2 samples for 3 h.
